# Supplementary material for: Connexin-Based Therapeutics and Tissue Engineering Approaches to the Amelioration of Chronic Pancreatitis and Type I Diabetes: Construction and Characterization of a Novel Prevascularized Bioartificial Pancreas
Source: J Diabetes Res. 2015 Dec 14;2016:7262680. doi: 10.1155/2016/7262680 (PMC4691620; doi:10.1155/2016/7262680)
Supplement: Supplementary file 1 — Figure 1: Demonstrates that insulin levels are similar in free islets and islets embedded in SPECs. Figure 2: Shows that while the broad-spectrum connexin inhibitor flufenamic acid inhibits insulin secretion, JM2 does not affect insulin secretion in free islets. [file 7262680.f1.zip]

Archive with 2 entries (2 files):
- SupFig1.ai
- SuppFig2.ai
